1 **Risk Factors for Chikungunya Outbreak in Kebridhar City, Somali Ethiopia,**  
2 **2019. Unmatched Case-Control Study**

3 **Authors**

4 Mikias Alayu<sup>1</sup>, Tesfalem Teshome<sup>2</sup>, Hiwot Amare<sup>1</sup>, Solomon Kinde<sup>1</sup>, Desalegn Belay<sup>1</sup>, Zewdu  
5 Assefa<sup>1</sup>

6 **Affiliations**

7 <sup>1</sup>Ethiopian Public Health Institute, Center for Public Health Emergency Management

8 <sup>2</sup>St. Paul Hospital Millennium Medical College, Department of Public Health

9 **\*Corresponding Author:**

10 Mikias Alayu

11 Ethiopian Public Health Institute, Addis Ababa, Ethiopia

12 P.O.BOX: 1242/5654

13 E-mail: [mikiasalayu7@gmail.com](mailto:mikiasalayu7@gmail.com)

14 Tel.: +251921746100

15

16 **Abstract**

17 **Background;** *Chikungunya Virus* is a Ribose Nucleic Acid (RNA) virus transmitted by a mosquito  
18 bite. *Aedes Aegypti* and *Aedes Albopictus* are responsible vectors for *Chikungunya Virus*  
19 transmission. CHIKV outbreaks are characterized by rapid spread and infection rates as high as  
20 75%. A combination of health system efforts and healthy behavior practices by the community is  
21 essential for effective control.

22 **Methods;** Unmatched case control study was done to identify risk factors of this outbreak. One  
23 case to two controls ratios was calculated. All cases during the study period (74 cases) and 148  
24 controls were included in the study. Bivariate and multivariable analysis were implemented. Serum  
25 samples were tested by Real Time Polymerase Chain Reaction at Ethiopian Public Health Institute  
26 laboratory.

27 **Results;** A total of 74 chikungunya fever cases were reported starting from 19<sup>th</sup> May 2019 to 8<sup>th</sup>  
28 June 2019. Not using bed net at day time sleeping (P- value < 0.001, AOR 20.8, 95CI 6.4 – 66.7),  
29 presence of open water holding container (P- value 0.023, AOR 4, 95CI 1.2 – 13.5), presence of  
30 larvae in water holding container (P- value 0.015, AOR 4.8, 95CI 1.4 – 16.8), ill person with  
31 similar sign and symptoms in the family or neighbors (P- value <0.001, AOR 27.9, 95CI 6.5 –  
32 120.4) and wearing not full body cover clothes (P- value 0.002, AOR 8.1, 95CI 2.2 – 30.1) were  
33 significant risk factors.

34 **Conclusion;** Using bed nets at day time sleeping, cover the water holding containers, wearing full  
35 body cover cloths are protective factors.

36

37 **Keywords:** Risk factor, Chikungunya, Outbreak, Kebridhar, Ethiopia

## 38 **Background**

39 *Chikungunya Virus* (CHIKV) is an RNA virus that belongs to the *Alphavirus* genus of the  
40 *Togaviridae* family transmitted by the bite of mosquitoes *Aedes aegypti* and *Aedes albopictus*.  
41 CHIKV outbreaks are characterized by rapid spread and infection rates as high as 75%; 72%–93%  
42 of infected persons become symptomatic. The disease manifests as acute fever and potentially  
43 debilitating polyarthralgia [1].

44 The *Aedes Mosquitoes* breed in domestic settings such as flower vases, water-storage containers,  
45 etc. and peri-domestic areas such as construction sites, coconut shells, discarded household junk  
46 items (vehicular tyre, plastic and metal cans, etc.). Adult mosquitoes rest in cool and shady areas  
47 in domestic and peri-domestic settings and bite humans commonly during the daytime [2].

48 Since the first outbreak in Tanzania in 1952 Chikungunya Virus has caused outbreaks in various  
49 parts of Africa. Chikungunya Virus has been found to circulate in Eastern and Central Africa.  
50 Chikungunya fever is commonly a self-resolved disease. Whereas, patients with coexisting  
51 conditions such as cardiovascular, neurologic, and respiratory disorders or diabetes needs  
52 hospitalization. Additionally, *Chikungunya Virus* may present with bleeding when co-exist with  
53 dengue fever [3-5].

54 *Chikungunya Virus* is a highly contagious disease that can affect up to 70% of the total population  
55 of the outbreak affected area. The virus can easily transmit across continents and the current  
56 growing of movement of people from one country to another country as well as international trade  
57 facilitate the importation of the virus [6].

58 Typical presentations of *Chikungunya Virus* infection are sudden onset of fever and joint pain but  
59 sometimes it may cause severe complications including myocarditis, meningitis, encephalitis, and  
60 flaccid paralysis [7].

61 Frequent outbreaks of *Chikungunya Virus* infection suggest that health system efforts for vector  
62 control alone may not be sufficient for effective control. A combination of health system efforts  
63 and healthy behavior practices by the community is essential for effective control of chikungunya  
64 outbreak [8].

65 The prevention mechanisms for *Chikungunya Virus* are reduce human mosquito contact or  
66 eliminate vector populations. In this regard, control measures should be focused on eliminating  
67 the immature stages of the mosquitoes and their larval developmental sites [9]. This study helps to  
68 identify the potential risk factors for this chikungunya outbreak in order to implement appropriate  
69 vector control measures. This study can also be used as an information source for future planning  
70 in regard to efforts towards arboviral disease controls.

## 71 **Methods**

### 72 **Study area and period**

73 This study was conducted at Kebridahar City Administration of Somali Region. Kebridahar City  
74 is located 1006 kilometers to the East direction of Addis Ababa and 380 kilometers away from  
75 Jigjiga. The city administration has ten kebeles. The area is lowland with temperature ranged from  
76 32°C to 40°C. According to census 2007 of Ethiopia, the city administration has a total population  
77 of 117,222. Fifty seven percent (66,817) of them were males and 12% (14,067) were children  
78 below five years of age. There were two public hospitals in Kebridahar City Administration. This  
79 outbreak investigation was conducted for one month, from 25<sup>th</sup> May 2019 to 25<sup>th</sup> June 2019.

### 80 **Study Design**

81 Unmatched case control study was conducted to determine the risk factors of chikungunya fever  
82 disease outbreak and to design appropriate intervention strategies in Kebridahar City  
83 Administration of Somali Region.

## 84 **Source Population**

85 All the residents of Kebridahar City were the source population.

## 86 **Study Population**

87 The study population for this study were all people diseased with chikungunya fever and controls  
88 selected for the study from the source population.

## 89 **Sampling Method and Sample Size**

90 For this study the case to control ratio was 1 to 2. All cases and two controls for each case were  
91 included. Therefore, 74 cases and 148 controls were participated in the study.

### 92 **• Selection of Cases**

93 All individuals who full fill the case definition of chikungunya fever and who was willing to  
94 participate in the study were included in the study as a case. The cases were identified both from  
95 health facility and from the community by active case search.

### 96 **• Selection of Controls**

97 Two controls for each case were selected from the neighbor households. One control was taken  
98 randomly by lottery method from members of the household on the right side of the case's house  
99 and the other control was selected by the same method from the household on the left side of the  
100 case's house.

## 101 **Case Definitions and Outbreak Threshold**

### 102 **• Suspected Case**

103 A person with acute onset of fever and severe arthralgia or arthritis not explained by other medical  
104 conditions, and who resides or has visited epidemic or endemic areas within 2 weeks before the  
105 onset of symptoms [10].

106           •   **Confirmed Case**

107   A suspected case with one of the following laboratory findings

- 108   •   Isolation of virus from, or demonstration of specific viral antigen or nucleic acid in, tissue,  
109       blood, or other body fluid, OR
- 110   •   Four-fold or greater change in virus-specific quantitative antibody titers in paired serum  
111       samples, OR
- 112   •   Virus-specific IgM antibodies in serum with confirmatory neutralizing antibodies in the same  
113       or a later specimen [10].

114           •   **Outbreak Threshold**

115   In non-endemic area a single case of suspected Chikungunya Virus is considered as a suspected  
116   outbreak and if one case is confirmed by one of the laboratory methods it is considered as a  
117   confirmed outbreak [11].

118   **Operational Definitions**

119   Breteau index: - Number of containers which have larvae of *Aedes Mosquito* per 100 households  
120   inspected.

121   House index: - Percentage of households from where larvae of *Aedes Mosquito* was identified per  
122   the number of households inspected.

123   Container index: - Percentage of containers which have at least one larvae or pupa of *Aedes*  
124   *Mosquito* per the number of containers inspected.

125   Positive household: - A household in which at least one larvae or pupa of *Aedes Mosquito* was  
126   identified in at least one water container.

127   Negative household: - A household in which no larvae or pupa of *Aedes Mosquito* was identified.

128 Positive container: - A water holding container in which at least one larvae or pupa of *Aedes*  
129 *Mosquito* was found.

130 Negative container: - A water holding container in which larvae or pupa of *Aedes Mosquito* was  
131 not found.

132 Kebele: - The lowest political administration structure in Ethiopian administration system.

133 Epidemiologically linked: - Cases who have evidence of contact with confirmed cases.

### 134 **Data Collection**

135 Epidemiological data were collected by face to face interview of cases and controls. Entomological  
136 data was collected by observation of water containers among selected households from four high  
137 case reporting kebeles (02, 03, 09, and 10). Larvae and pupas were collected by dipper and pipette  
138 and put them in to a well labeled cup with net covers to allow them to grow into adult mosquito.  
139 Once the adult mosquitos were grown, *Aedes Mosquito* was identified by mosquito identification  
140 key.

141 Regarding the human (laboratory) sample for confirmation, five serum samples were collected  
142 from suspected cases and transported to Ethiopian Public Health Institute (EPHI) Arbovirus  
143 Laboratory as per the recommended cold chain protocol. The laboratory expert from the hospital  
144 was transported the sample to EPHI as per the recommended cold chain protocol.

### 145 **Data Analysis and Presentation**

146 After the data was cleaned and checked for completeness, entered into Epi Info Version 7.2 and  
147 exported to SPSS version 23. Descriptive analysis by person, place and time were done. Bivariate  
148 and multivariable binary logistic regressions were performed to identify risk factors for this  
149 chikungunya outbreak. The result was interpreted by using odds ratio with 95% confidence level  
150 and P-value of 0.05.

151 Breteau index, house index and container index were calculated for entomological data.  
152 To confirm the etiologic agent of the outbreak, serum samples were tested by Real Time  
153 Polymerase Chain Reaction (RT-PCR) after viral Ribose Nucleic Acid (RNA) was extracted.

## 154 **Ethical consideration**

155 Support letter was written by Ethiopian Public Health Institute, Center for Public Health  
156 Emergency Management (PHEM) to Somali Regional Health Bureau and Kebridahar City  
157 Administration Health Office. Permission to investigate the outbreak was obtained from regional  
158 health bureau and the city health office as well as the mayor office of Kebridahar City  
159 Administration. This study is an outbreak investigation. Hence, it was not pass through ethical  
160 review process because outbreak investigation is not a planned study rather it is part of the outbreak  
161 control and prevention activity.

162 The interviewers had explained about the objectives, the process and the benefits of the study for  
163 each participant. Each participants were asked for their informed consent and interviewing was  
164 conducted after written consent was received from the participant. In case of interviewing children,  
165 the consent was obtained from their parents and guardians. Cases identified during data collection  
166 were sent to health facility for treatment.

## 167 **Result**

### 168 **Socio demographic characteristics of respondents**

169 A total of 222 participants, 74 cases and 148 controls, were interviewed for this study. None  
170 response rate was zero.

171 From the total participants, 59% (132) were female and 14% (32) were children below five years  
172 old (Table 1).



173 Table 1 Socio demographic characteristics of study participants, Kebridhar City Administration,  
174 Koraha Zone of Somali Region, Ethiopia 2019.

| Variable           |                     | Cases |     | Controls |     | Total |     |
|--------------------|---------------------|-------|-----|----------|-----|-------|-----|
| Sex                | Female              | 33    | 45% | 95       | 64% | 132   | 59% |
|                    | Male                | 41    | 55% | 53       | 36% | 90    | 41% |
| Age                | Under 5             | 2     | 3%  | 30       | 20% | 32    | 14% |
|                    | 5-14                | 16    | 22% | 33       | 22% | 49    | 22% |
|                    | 15-45               | 49    | 66% | 54       | 36% | 103   | 46% |
|                    | 45+                 | 7     | 9%  | 31       | 21% | 38    | 17% |
| Educational status | No formal Education | 51    | 69% | 78       | 53% | 129   | 58% |
|                    | NA                  | 1     | 1%  | 12       | 8%  | 12    | 5%  |
|                    | Primary school      | 15    | 20% | 43       | 29% | 58    | 26% |
|                    | Secondary school    | 7     | 9%  | 15       | 10% | 22    | 10% |
| Marital status     | Married             | 56    | 76% | 75       | 51% | 131   | 59% |
|                    | NA                  | 18    | 24% | 47       | 32% | 65    | 29% |
|                    | Single              | 0     | 0%  | 15       | 10% | 15    | 7%  |
|                    | Widowed             | 0     | 0%  | 11       | 7%  | 11    | 5%  |
| Occupation         | Daily laborer       | 11    | 15% | 0        | 0%  | 11    | 5%  |
|                    | House wife          | 24    | 32% | 68       | 46% | 92    | 41% |
|                    | Merchant            | 21    | 28% | 22       | 15% | 43    | 19% |
|                    | NA                  | 0     | 0%  | 12       | 8%  | 12    | 5%  |
|                    | Student             | 18    | 24% | 46       | 31% | 64    | 29% |

|             |             |    |      |     |      |     |      |
|-------------|-------------|----|------|-----|------|-----|------|
| Family size | Above 10    | 9  | 12%  | 20  | 14%  | 29  | 13%  |
|             | Less than 5 | 25 | 34%  | 49  | 33%  | 74  | 33%  |
|             | 5 to 10     | 40 | 54%  | 79  | 53%  | 119 | 54%  |
| Total       |             | 74 | 100% | 148 | 100% | 222 | 100% |

175

## 176 **Description of cases**

177 A total of 74 chikungunya fever cases were reported from Kebridhar City Administration starting  
178 from 19<sup>th</sup> May 2019 to 8<sup>th</sup> June 2019 (Figure 1).

179 Figure 1 Distribution of Chikungunya fever cases by date of onset of fever in Kebridhar City  
180 Administration, Somali, Ethiopia 2019.

181 Of five samples sent to EPHI laboratory three were positive for Chikungunya Virus (positivity rate  
182 is 60%) and the rest of cases were epidemiologically linked. Eighty nine percent (66) were treated  
183 as an outpatient and 10.8% (12/74) cases were treated as an inpatient.

184 Among a total of 74 cases, 41 (55.4%) were males and 33 (44.6%) were females. Two cases were  
185 children less than five-year-old and seven cases were above 45 years old. The overall attack rate  
186 of the outbreak was 63 cases per 100,000 at risk population. The highest attack rate was among  
187 the age group of 15 – 44 (83/100,000) and the lowest attack rate was among the age group of  
188 bellow five years (22/100,000) (Table 2). The median age of cases was 25 years (IQR: 20 – 33).

189 The case fatality rate of this outbreak was zero. The attack rates among males and females were  
190 62 and 66 cases per 100,000 risk population respectively.

191 Table 2 Distribution of chikungunya cases by age group, Kebridhar City Administration, Somali,  
192 Ethiopia, 2019

| Age group<br>(in years) | Number of cases | Percent | At risk<br>Population | Attack Rate per<br>100,000 at risk<br>population |
|-------------------------|-----------------|---------|-----------------------|--------------------------------------------------|
| Less than 5             | 2               | 2.70%   | 9,050                 | 22                                               |
| 5 – 14 Years            | 16              | 21.60%  | 35,970                | 44                                               |
| 15 – 44 Years           | 49              | 66.20%  | 59,047                | 83                                               |
| Above 45 Years          | 7               | 9.50%   | 13,155                | 53                                               |
| Total                   | 74              | 100.00% | 117,222               | 63                                               |

193 **Sign and symptoms**

194 All cases had fever and joint pain. None of the cases had bleeding (Table 3).

195 Table 3 Distribution of chikungunya cases by sign and symptoms in Kebridhar City

196 Administration, Somali, Ethiopia, 2019

| Sign and symptom | Yes      | Percent | No (Number) | Percent | Total |
|------------------|----------|---------|-------------|---------|-------|
|                  | (Number) |         |             |         |       |
| Fever            | 74       | 100%    | 0           | 0%      | 74    |
| Joint pain       | 74       | 100%    | 0           | 0%      | 74    |
| Headache         | 53       | 72%     | 21          | 28%     | 74    |
| Rash             | 8        | 11%     | 66          | 89%     | 74    |
| Nausea/vomiting  | 37       | 50%     | 37          | 50%     | 74    |
| Bleeding         | 0        | 0%      | 74          | 100%    | 74    |

197 **Entomological findings**

198 A total of 26 household and 49 water containers were visited from four kebeles of Kebridhar City  
 199 to identify the mosquito species. Among those containers in the visited households 26.5% (13/49)  
 200 were positive containers and the rest 73.5% (36/49) were negative containers.

201 Of the visited households 38.5% (10/26) were positive households. The highest breteau index and  
 202 house index were identified from Kebele Ten, whereas the highest container index was in Kebele  
 203 Two of the city (Table 4).

204 Table 4 Indices of *Aedes aegypti* mosquito by kebele in Kebridhar City Administration, Somali,  
 205 Ethiopia, 2019

| Location Investigated |         | Type of Vector Found | Aedes aegypti Stegomyia Indices |             |                 |
|-----------------------|---------|----------------------|---------------------------------|-------------|-----------------|
| District              | Kebeles |                      | Breteau Index                   | House Index | Container Index |
| Kebridhar City        | 02      | <i>Aedes aegypti</i> | 50%                             | 37.5%       | 50%             |
|                       | 03      | <i>Aedes aegypti</i> | 28.5%                           | 28.5%       | 22.2%           |
|                       | 09      | <i>Aedes aegypti</i> | 33.3%                           | 33.3%       | 28.6%           |
|                       | 10      | <i>Aedes aegypti</i> | 66.6%                           | 44.4%       | 37.5%           |

206 **Risk factors of chikungunya fever**

207 All participants responded that, they have bed net but their houses were not sprayed with in six  
 208 months prior to this outbreak. Also, all the study participants had water holding container in their  
 209 compound and they have never used mosquito repellants.

210 In bivariate analysis ten variables were analyzed and eight of them had a P-Value of less than 0.05.

211 Sex, knowing the symptoms and prevention mechanisms of chikungunya, knowing that *Aedes*

212 *Mosquito* bites commonly at day time, using LLINs at day time sleeping, status of water holding  
 213 container, presence of larvae in water holding container, ill person with similar sign and symptoms  
 214 in the family of neighbors and type of close they commonly were are significant in bivariate  
 215 analysis.

216 In multivariable analysis eight variables significant by bivariate analysis were entered in to the  
 217 model. The odds of being affected by chikungunya disease was 21 times higher among people not  
 218 using LLINs at day time sleeping (P- value < 0.001, AOR 20.8, 95CI 6.4 – 66.7), four times higher  
 219 among people who have open water container (P- value 0.023, AOR 4, 95CI 1.2 – 13.5), five times  
 220 higher among people whose water container had mosquito larvae (P- value 0.015, AOR 4.8, 95CI  
 221 1.4 – 16.8), 28 times higher among people who have neighbors with chikungunya sign and  
 222 symptoms (P- value < 0.001, AOR 27.9, 95CI 6.5 – 120.4) and eight times higher among people  
 223 who usually wears cloths not full body cover (P- value 0.002, AOR 8.1, 95CI 2.2 – 30.1) (Table  
 224 5).

225 Table 5 Multivariable analysis of chikungunya risk factors in Kebridhar City Administration of  
 226 Somali, Ethiopia 2019

| Variables                                       | Controls (%) | Cases (%) | P – Value | AOR | 95% CI |     |
|-------------------------------------------------|--------------|-----------|-----------|-----|--------|-----|
| Sex                                             |              |           |           |     |        |     |
| Female                                          | 95 (64.2)    | 33 (44.6) |           | 1   |        |     |
| Male                                            | 53 (35.8)    | 41 (55.4) | 0.331     | 1.8 | 0.6    | 6.1 |
| Knowing symptoms and preventions of chikungunya |              |           |           |     |        |     |
| Yes                                             | 71 (48.0)    | 13 (17.6) |           | 1   |        |     |

|                                                                         |            |           |        |      |     |       |
|-------------------------------------------------------------------------|------------|-----------|--------|------|-----|-------|
| No                                                                      | 77 (52.0)  | 61 (82.4) | 0.075  | 3.3  | 0.9 | 12.0  |
| Knowing that Aedes Mosquito bites commonly at day time                  |            |           |        |      |     |       |
| Yes                                                                     | 65 (43.9)  | 21 (28.4) |        | 1    |     |       |
| No                                                                      | 83 (56.1)  | 53 (71.6) | 0.189  | 2.2  | 0.7 | 7.0   |
| Using LLINs at day time sleeping                                        |            |           |        |      |     |       |
| Yes                                                                     | 130 (87.8) | 12 (16.2) |        | 1    |     |       |
| No                                                                      | 18 (12.2)  | 62 (83.8) | <0.001 | 20.8 | 6.4 | 66.7  |
| Status of water holding container                                       |            |           |        |      |     |       |
| Closed                                                                  | 123 (83.1) | 23 (31.1) |        | 1    |     |       |
| Open                                                                    | 25 (16.9)  | 51 (68.9) | 0.023  | 4.0  | 1.2 | 13.5  |
| Presence of larvae in water holding container                           |            |           |        |      |     |       |
| Yes                                                                     | 21 (14.2)  | 50 (67.6) | 0.015  | 4.8  | 1.4 | 16.8  |
| No                                                                      | 127 (85.8) | 24 (32.4) |        | 1    |     |       |
| Ill person with chikungunya in the house hold and neighbors             |            |           |        |      |     |       |
| Yes                                                                     | 15 (10.1)  | 47 (63.5) | <0.001 | 27.9 | 6.5 | 120.4 |
| No                                                                      | 133 (89.8) | 27 (36.5) |        | 1    |     |       |
| Kind of clothes they wear commonly since the emergence of this outbreak |            |           |        |      |     |       |
| Full body cover                                                         |            |           |        |      |     |       |
| Short                                                                   | 115 (77.7) | 22 (29.7) |        | 1    |     |       |

|  |           |           |       |     |     |      |
|--|-----------|-----------|-------|-----|-----|------|
|  | 33 (22.3) | 52 (70.3) | 0.002 | 8.1 | 2.2 | 30.1 |
|--|-----------|-----------|-------|-----|-----|------|

## 227 **Discussion**

228 After its reemergence in 2004, CHIKV has caused numerous epidemics around the world,  
229 including new spread to previously non endemic regions, such as the Americas, Europe, the Middle  
230 East, and Oceania [12]. The first outbreak in Ethiopia was detected in Dolo Ado District of Somali  
231 Region in 2016, since then this is the third outbreak following similar outbreak in Adar District of  
232 Afar Region in March 2019.

233 To confirm this chikungunya outbreak Polymerase Chain Reaction (PCR) test was done and the  
234 positivity rate was 60%. Studies in other countries also showed that, the positivity rates of CHIKV  
235 among suspected cases ranges from 12.9% to 75% [13-16].

236 Among the total cases 10.8% were treated as an inpatient, which is lower than the similar study in  
237 Malaysia. That study also showed that, the attack rate ranged from 0.6 to 63 per 100,000 population  
238 in different districts [17]. In our study the attack rate of the outbreak was 63 cases per 100,000 at  
239 risk population. Studies in Malaysia showed that the case fatality rate of chikungunya fever is zero  
240 [2,17]. Similarly, the case fatality rate of the chikungunya outbreak in Kebridhar City is zero.

241 The median age of the chikungunya fever cases in Kebridhar City was 25 years, this finding is  
242 almost similar to the median age of chikungunya fever cases (24 years) found from a cross-  
243 sectional study in Tanzania [13].

244 Acute phase of Chikungunya Virus infection is characterized by high grade fever and sever joint  
245 pain. Bleeding is less likely among individuals infected by Chikungunya Virus [18]. Our  
246 investigation result also supports this evidence, which founded that all cases had fever and joint  
247 pain but no case was presented with bleeding.

248 *Aedes Mosquito* larval index is categorized as high and low larval index based on house and breteau  
249 indices. High larval index is when the house index is  $\geq 5\%$  and/or breteau index is  $\geq 20\%$  [19].  
250 Hence, the findings of our study shows that Breteau index and house index of *Aedes aegypti* were  
251 ranges from 28.5% to 66.6% and from 28.5 to 44.4% respectively.

252 In this outbreak investigation the odds of being affected by chikungunya fever is 21 times higher  
253 among peoples who did not use bed net during day time sleep compared to those used, four times  
254 higher among peoples having open water holding container comparing to those properly close their  
255 containers, four point eight times higher among peoples whose water container had larvae of  
256 mosquitos compared to those whose water containers did not have larvae, 28 times higher among  
257 peoples living with ill persons with similar sign and symptoms compared to not living with affected  
258 peoples and eight times higher among peoples wearing shorts and T-shirts than peoples wear full  
259 body cover clothes. These findings were supported by studies done in Malaysia, South India and  
260 Central Nepal. These studies shows, not using full body cover clothes, not using mosquito net or  
261 coil, having uncovered plastic water containers and staying with relatives infected with  
262 Chikungunya Virus are significant risk factors for Chikungunya Virus infection [8-9,17].

263 On the other hand, a retrospective study of chikungunya outbreak in India founds differences in  
264 awareness of chikungunya, cause of the disease, vector responsible, mode of transmission, biting  
265 time and elimination of breeding of mosquitoes are significant risk factors, which are not  
266 significantly associated with Chikungunya Virus infection in our study [3].

## 267 **Conclusion**

268 This outbreak was the third chikungunya outbreak in Ethiopian by which females were more  
269 affected than males but no death was registered. Fever and joint pain were the commonest  
270 manifestation of chikungunya fever in this outbreak but no case was presented with bleeding.



271 This study indicated that, the larval indices of *Aedes Aegypti* mosquito was high in the city  
272 administration during the outbreak period.

273 Not using bed net during day time sleeping, having an open water container, presence of Aedes  
274 Mosquito larvae in water holding container, living with people having chikungunya sign and  
275 symptoms and wearing clothes which did not cover the full body were risk factors for being  
276 affected by chikungunya fever.

277 Therefore, there should be regular indoor and outdoor spraying of insecticidal chemicals, regular  
278 monitoring of water containers which are difficult to drain as well as to cover and apply larvicidal  
279 chemicals, awareness creation on day time bed net utilization, drainage of unusable stored water  
280 and educate the community to cover all water containers in and around the house and promote the  
281 people to wear full body cover cloths and use mosquito repellants in the time when there is an  
282 outbreak are helpful to prevent and control chikungunya outbreaks.

### 283 **Competing of interest**

284 All authors declare that, they have no any competing of interest.

### 285 **Author's contribution**

286 MA design the study, participate in field investigation, conduct analysis and write the manuscript.  
287 TT participate in designing the study and manuscript writing. HA and DB involved in laboratory  
288 confirmation. HA and SD participate in field investigation and data analysis. All authors review  
289 the manuscript and approve the submission.

### 290 **Acknowledgement**

291 The authors would like to acknowledge Ethiopian Public Health Institute and Somali Regional  
292 Health Bureau for facilitating the investigation and financial support during the investigation time.

## 293 **References**

- 294 1. Nasci RS. Movement of Chikungunya Virus into the Western Hemisphere. US CDC  
295 emerging infectious disease. 2014; 20(8):1394-1395.
- 296 2. World Health Organization Regional Office for South East Asia. Guideline for prevention  
297 and control of chikungunya fever.  
298 [www.wpro.who.int/mvp/topics/ntd/Chikungunya\\_WHO\\_SEARO.pdf](http://www.wpro.who.int/mvp/topics/ntd/Chikungunya_WHO_SEARO.pdf). Accessed 6 July,  
299 2019.
- 300 3. Nagpal BN, Saxena R, Srivastava A, Singh N, Ghosh SK, Sharma SK, et al. Retrospective  
301 study of chikungunya outbreak in urban areas of India. Indian J Med Res. 2012; 135(3):351–  
302 358.
- 303 4. Weaver SC, Lecuit M. Chikungunya virus and the global spread of a mosquito-borne  
304 disease. N Engl J Med. 2015; 372(13):1231–1239.
- 305 5. Staples JE, Breiman RF, Powers AM. Chikungunya Fever: An Epidemiological Review of  
306 a Re-Emerging Infectious Disease. Clin Infect Dis. 2009; 49(6):942–948.
- 307 6. Rodrigues Faria N, Lourenço J, Marques de Cerqueira E, Maia de Lima M, Pybus O, Carlos  
308 Junior Alcantara L. Epidemiology of Chikungunya Virus in Bahia, Brazil, 2014 - 2015.  
309 PLOS Currents Outbreaks. 2016:1–9.
- 310 7. Appassakij H, Khuntikij P, Kemapunmanus M, Wutthananarungsan R, Silpapojakul K.  
311 Viremic profiles in asymptomatic and symptomatic chikungunya fever: A blood transfusion  
312 threat? Transfusion. 2013; 53(10):2567–2574.
- 313 8. Ramachandran V, Manickam P, Kaur P, et al. Behavioural Determinants Associated with  
314 CHIKV Outbreak in Gouriepet, Avadi, Chennai, South India. J Biomedical Sci. 2016;  
315 4(1):1–6.

- 316 9. Dhimal M, Gautam I, Joshi HD, O'Hara RB, Ahrens B, Kuch U. Risk Factors for the  
317 Presence of Chikungunya and Dengue Vectors (*Aedes aegypti* and *Aedes albopictus*), Their  
318 Altitudinal Distribution and Climatic Determinants of Their Abundance in Central Nepal.  
319 PLoS Negl Trop Dis. 2015; 9(3):1–20.
- 320 10. Hossain MS, Hasan MM, Islam MS, Islam S, Mozaffor M, et al. Chikungunya outbreak in  
321 Bangladesh: Clinical profile, economic impact and quality of life during the acute phase of  
322 the disease. PLoS Negl Trop Dis. 2018; 12(6): 1–16.
- 323 11. Ethiopian Public Health Institute. Public health emergency management guideline for  
324 Ethiopia. <https://www.ephi.gov.et/images/guidelines/phem-guideline-final.pdf>. Accessed 6  
325 July, 2019.
- 326 12. Sam, I., Kümmerer B., Chan F., Roques P. Christian A. Updates on Chikungunya  
327 Epidemiology, Clinical Disease, and Diagnostics. Vector borne and zoonotic diseases.  
328 2014; 15(4):223-230.
- 329 13. Kajeguka DC, Kaaya RD, Mwakalinga S, Ndossi R, Ndaro A, Chilongola JO, et al.  
330 Prevalence of dengue and chikungunya virus infections in north-eastern Tanzania: A cross  
331 sectional study among participants presenting with malaria-like symptoms. BMC Infect Dis.  
332 2016; 16(1):1–9.
- 333 14. Sergon K, Njuguna C, Kalani R, Ofula V, Onyango C, Konongoi LS, et al. Seroprevalence  
334 of Chikungunya Virus ( CHIKV ) Infection on Lamu Island , Kenya. American Journal of  
335 Tropical Medicine and Hygeine. 2008; 78(2):333–337.
- 336 15. Fuller TL, Calvet G, Estevam CG, Angelo JR, Abiodun GJ, Halai UA, et al. Behavioral,  
337 climatic, and environmental risk factors for Zika and Chikungunya virus infections in Rio  
338 de Janeiro, Brazil, 2015-16. PLoS One. 2017; 12(11):1–15.

- 339 16. Cardoso CW, Kikuti M, Prates APPB, Paploski IAD, Tauro LB, Silva MMO, et al.  
340 Unrecognized Emergence of Chikungunya Virus during a Zika Virus Outbreak in Salvador,  
341 Brazil. *PLoS Negl Trop Dis.* 2017; 11(1):1–8.
- 342 17. Yusoff AF, Mustafa AN, Husaain HM, Hamzah WM, Yusof AM, Harun R, et al. The  
343 assessment of risk factors for the Central/East African Genotype of chikungunya virus  
344 infections in the state of Kelantan: A case control study in Malaysia. *BMC Infect Dis.* 2013;  
345 13(1):1–8.
- 346 18. Staples E, Powers A, Tomashek K, Lanciotti R, Hunsperger E. Preparedness and Response  
347 for Chikungunya Virus Introduction in the Americas. 2011. Pan American Health  
348 Organization.
- 349 19. Balasubramanian R, Anukumar B, Nikhil L. Stegomyia indices of Aedes Mosquito  
350 infestation and container productivity in Alappuzha district Kerala, *International Journal of*  
351 *Mosquito Research*, 2015;2(2):14–8.
- 352 20. Morrison TE. Reemergence of Chikungunya Virus. *Journal of Virology*, 2014;  
353 88(20):11644–11647.
- 354

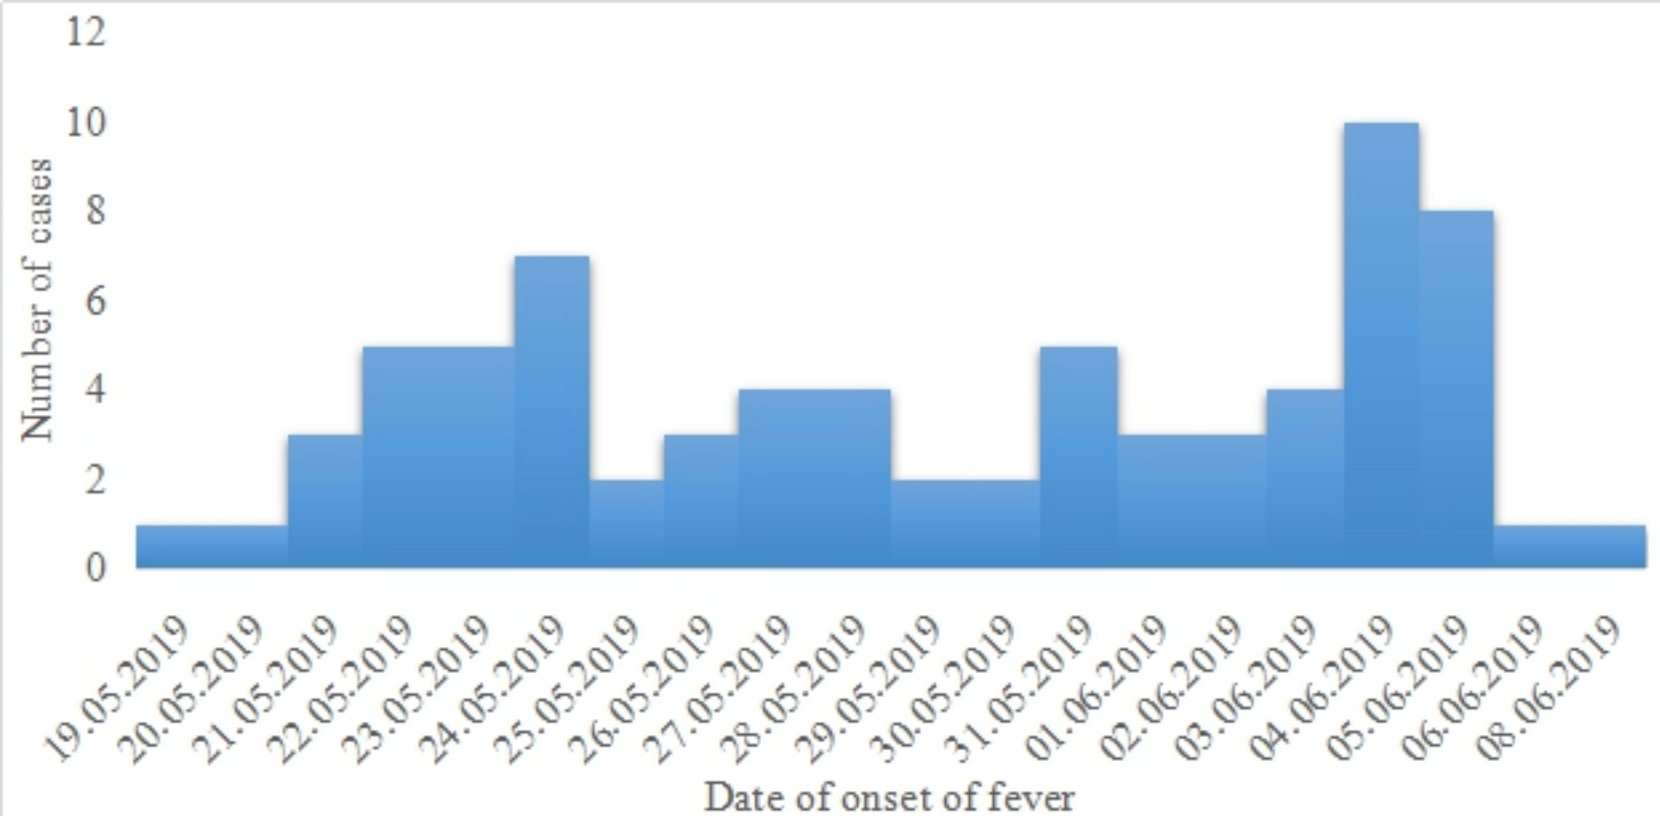

Figure
